# Supplementary material for: Evaluating Antioxidant Performance, Biosafety, and Antimicrobial Efficacy of Houttuynia cordata Extract and Microwave-Assisted Synthesis of Biogenic Silver Nano-Antibiotics
Source: MDPI journal article supplement (doi:10.3390/antiox13010032), 2023-12-22
Supplement: s1 [file s1]

## Supporting Information

# Evaluating Antioxidant Performance, Biosafety, and Antimicrobial Efficacy of *Houttuynia cordata* Extract and Microwave-Assisted Synthesis of Biogenic Silver Nano-Antibiotics

Kavya Moorthy <sup>1,†</sup>, Kai-Chih Chang <sup>2,3,†</sup>, Hsiao-Chi Huang <sup>2</sup>, Wen-Jui Wu <sup>2</sup> and Cheng-Kang Chiang <sup>1,\*</sup>

<sup>1</sup> Department of Chemistry, National Dong Hwa University, Shoufeng 97401, Taiwan; 810712202@gms.ndhu.edu.tw

<sup>2</sup> Department of Laboratory Medicine and Biotechnology, Tzu Chi University, Hualien 97004, Taiwan; kaichih@gms.tcu.edu.tw (K.-C.C.); 109323108@gms.tcu.edu.tw (H.-C.H.); w200811@gms.tcu.edu.tw (W.-J.W.)

<sup>3</sup> Department of Laboratory Medicine, Buddhist Tzu Chi General Hospital, Hualien 97004, Taiwan

\* Correspondence: ckchiang@gms.ndhu.edu.tw; Tel.: +886-3-8903622

† These authors share the first authorship.

|                                                                |    |
|----------------------------------------------------------------|----|
| <b>Table of Contents</b>                                       | S2 |
| <b>Figure S1.</b> XPS survey spectra of as-prepared HCE-AgNPs. | S3 |
| <b>Figure S2.</b> XPS C 1s spectra of HCE-AgNPs.               | S4 |
| <b>Figure S3.</b> XPS Cl 2p spectra of HCE-AgNPs.              | S5 |
| <b>Figure S4.</b> XPS O 1s spectra of HCE-AgNPs.               | S6 |
| <b>Figure S5.</b> XPS Ag 3d spectra of HCE-AgNPs.              | S7 |

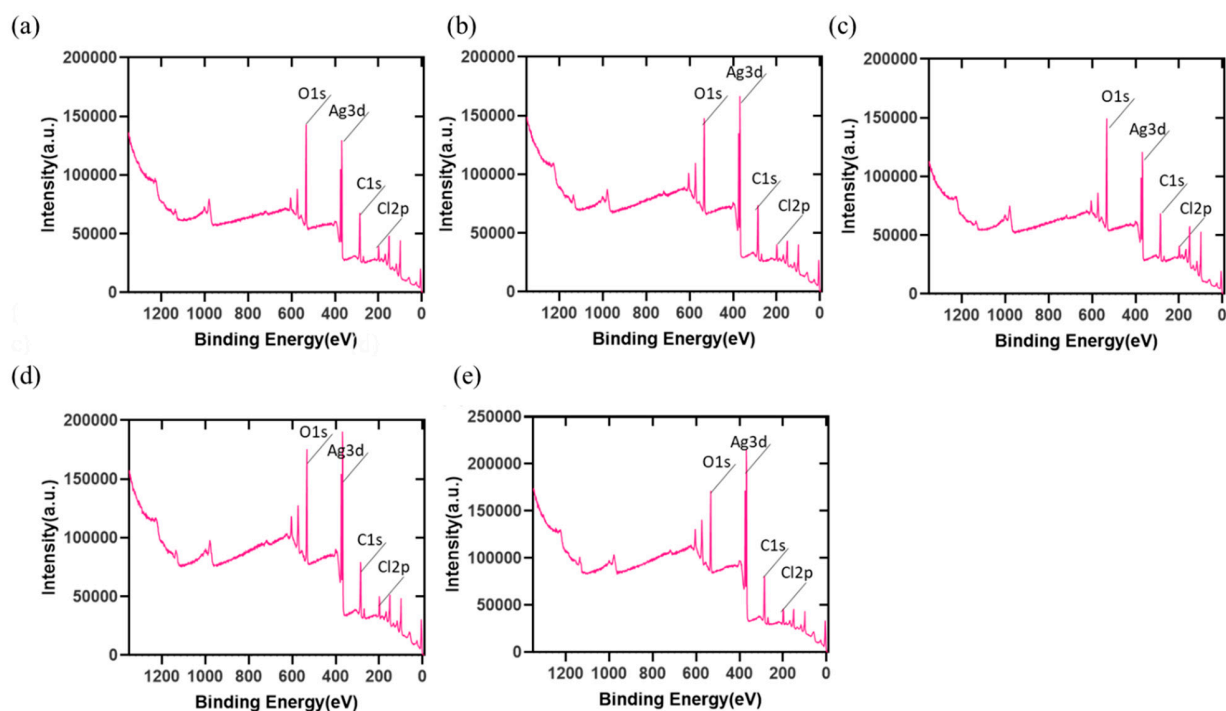

**Figure S1.** XPS survey spectra of MW2 HCE-AgNPs (a), MW5 HCE-AgNPs (b), MW10 HCE-AgNPs (c), MW20 HCE-AgNPs (d), and reflux method synthesis of HCE-AgNPs (e).

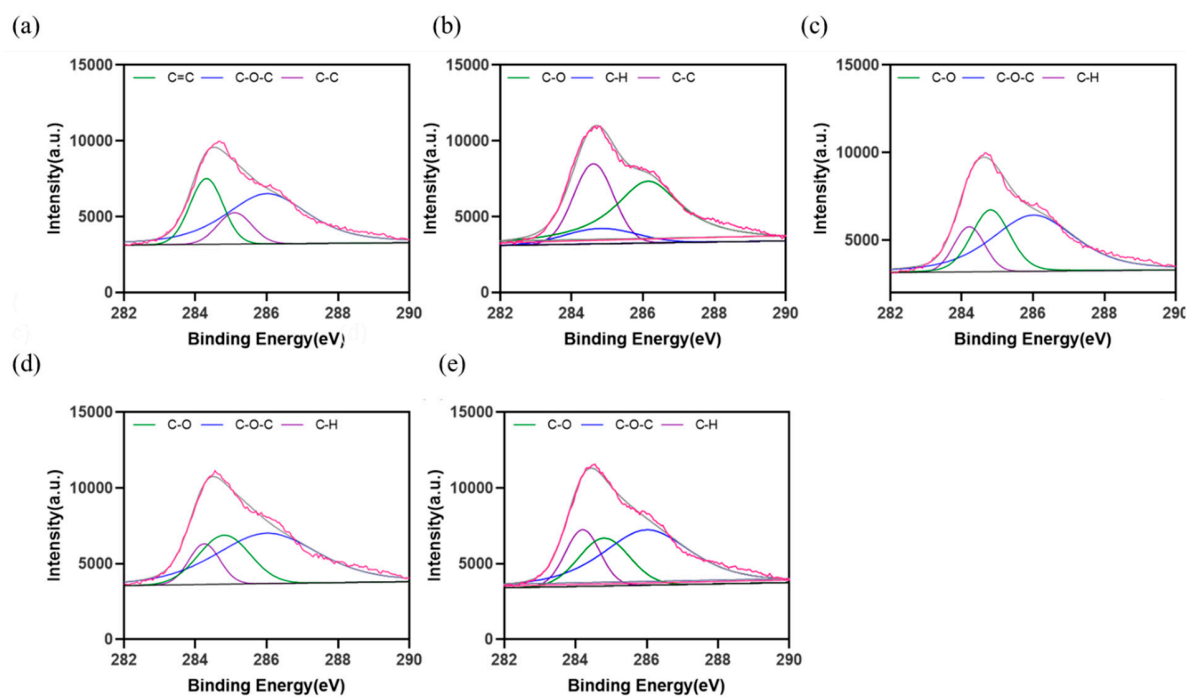

**Figure S2.** XPS C 1s spectra of MW2 HCE-AgNPs (a), MW5 HCE-AgNPs (b), MW10 HCE-AgNPs (c), MW20 HCE-AgNPs (d), and reflux method synthesis of HCE-AgNPs (e).

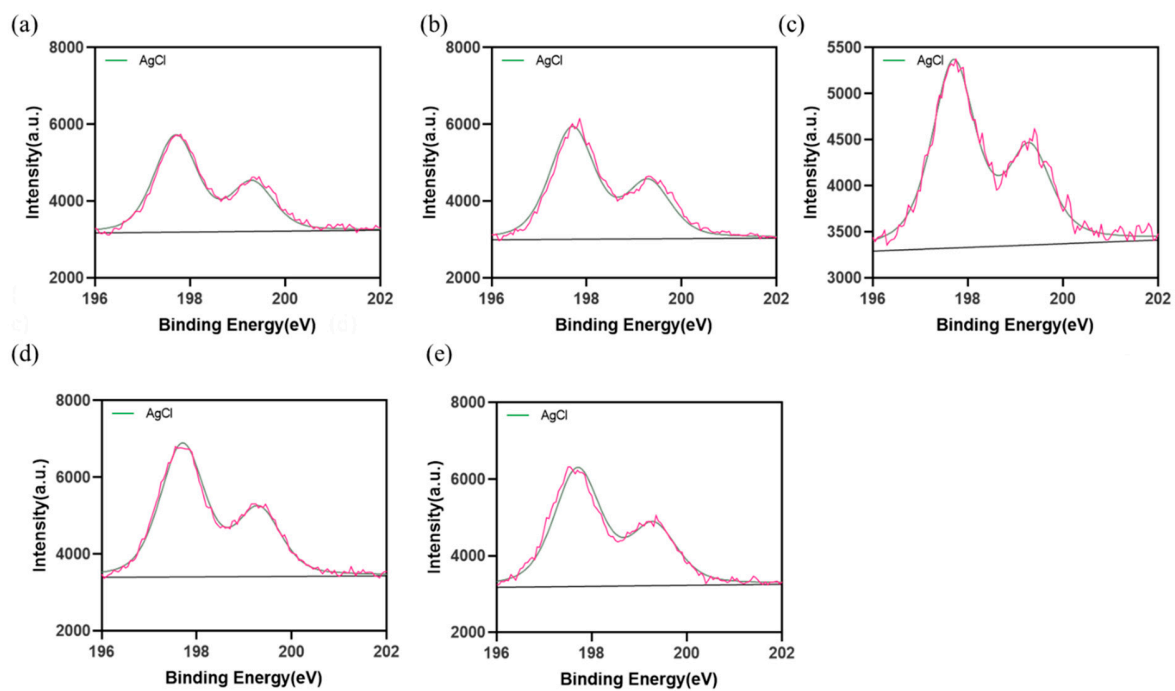

**Figure S3.** XPS Cl 2p spectra of MW2 HCE-AgNPs (a), MW5 HCE-AgNPs (b), MW10 HCE-AgNPs (c), MW20 HCE-AgNPs (d), and reflux method synthesis of HCE-AgNPs (e).

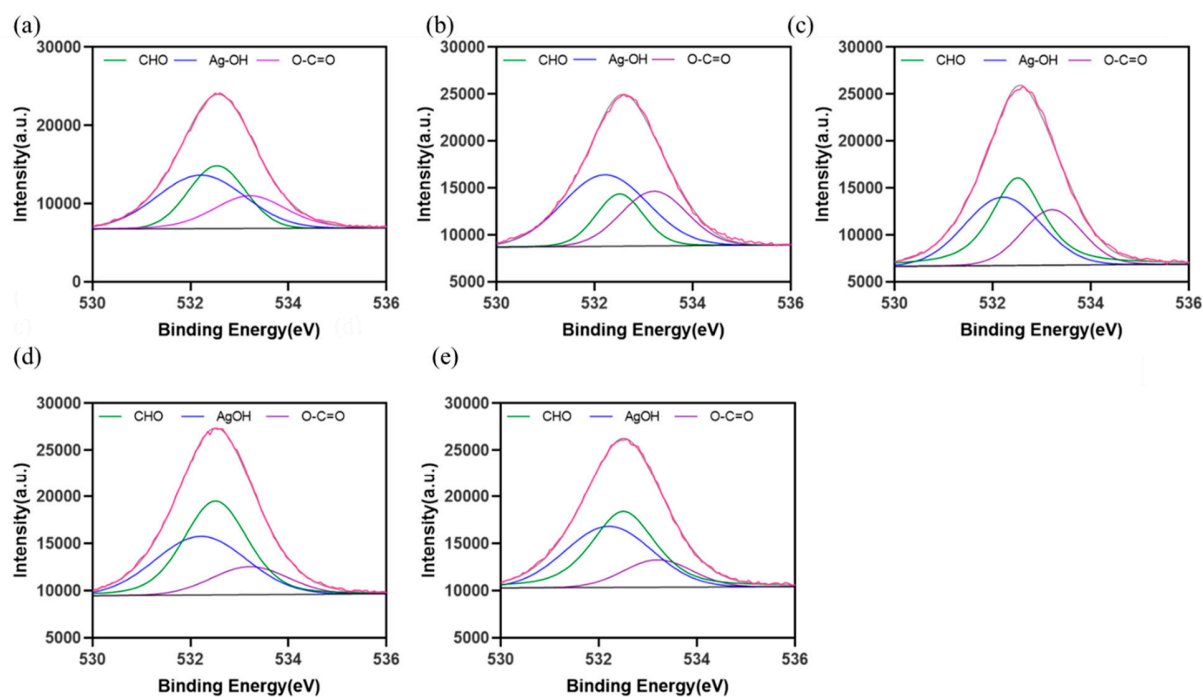

**Figure S4.** XPS O 1s spectra of MW2 HCE-AgNPs (a), MW5 HCE-AgNPs (b), MW10 HCE-AgNPs (c), MW20 HCE-AgNPs (d), and reflux method synthesis of HCE-AgNPs (e).

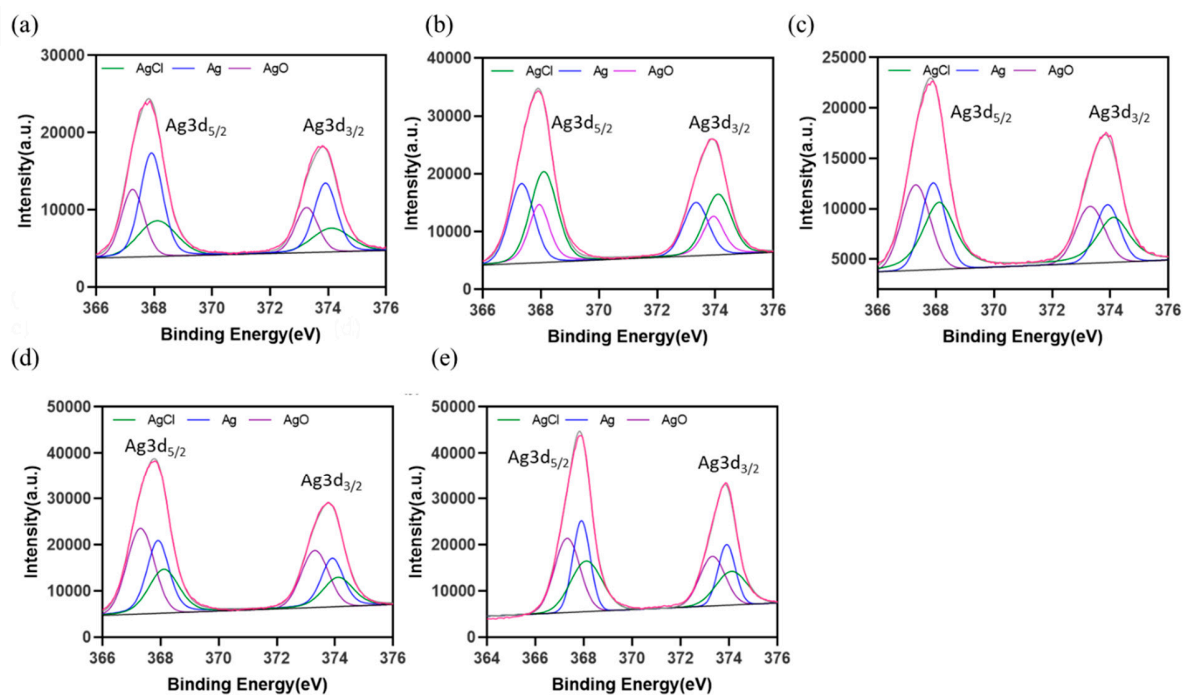

**Figure S5.** XPS Ag 3d spectra of MW2 HCE-AgNPs (a), MW5 HCE-AgNPs (b), MW10 HCE-AgNPs (c), MW20 HCE-AgNPs (d), and reflux method synthesis of HCE-AgNPs (e).
